1 Metabolomic analyses of plasma and liver of mice fed with immature *Citrus tumida*

2 peel

3

4 Atsushi Toyoda<sup>1,2,3\*</sup>, Mizuho Sato<sup>1</sup>, Masaki Muto<sup>1</sup>, Tatsuhiko Goto<sup>1,2#</sup>, Yuji

5 Miyaguchi<sup>1,2,3</sup>, Eiichi Inoue<sup>1,2,3</sup>

6

7 Short title: Metabolomics of mice fed with Citrus peels

8

9 <sup>1</sup> College of Agriculture, Ibaraki University, Ami, Ibaraki 300-0393, Japan

10 <sup>2</sup> Ibaraki University Cooperation between Agriculture and Medical Science (IUCAM),

11 Ami, Ibaraki 300-0393, Japan

12 <sup>3</sup> United Graduate School of Agricultural Science, Tokyo University of Agriculture and

13 Technology, Fuchu-city, Tokyo 183-8509, Japan

14 # Present address: Obihiro University of Agriculture and Veterinary Medicine, Obihiro,

15 Hokkaido 080-8555, Japan.

16

17 \*Corresponding Author:

18 E-mail: [atsushi.toyoda.0516@vc.ibaraki.ac.jp](mailto:atsushi.toyoda.0516@vc.ibaraki.ac.jp) (AT)

19

## 20 **Abstract**

21 Supplementing food with functional small molecules has been shown to prevent  
22 diseases and improve the quality of life, especially in elderly people. Citrus fruits and  
23 citrus fruit-products are popular food supplements across the world. In this study, we  
24 focused on a Japanese citrus fruit, *Citrus tumida* hort. ex Tanaka (*C. tumida*), and  
25 elucidated the effects of supplementation of the peels of immature *C. tumida* (PIC) on  
26 food intake, body and fat tissue weights, and metabolic profiles of plasma and liver in  
27 mice. Supplementation with 5% (w/w) PIC for 4 weeks significantly suppressed body  
28 weight gain and decreased adipose tissue weight, including that of the epididymal,  
29 perirenal, and subcutaneous fats. Metabolome analyses using capillary electrophoresis  
30 time-of-flight mass spectrometry showed that the level of 2-hydroxyvaleric acid was  
31 reduced in the blood plasma of mice fed with PIC. Supplementation with PIC  
32 significantly elevated the levels of dipeptides (Thr-Asp, Ser-Glu, and Ala-Ala),  
33 glucuronic acid (and/or galacturonic acid-2), and S-methylglutathione, and significantly  
34 reduced the levels of betaine aldehyde in the liver. In conclusion, PIC supplementation  
35 affects the metabolism of fatty acids, pectin, glutathione, and choline. Our study  
36 demonstrates the potential beneficial effects of PIC, especially in metabolic syndrome

37 and obesity. PIC may be developed as a functional food and used in the treatment of  
38 these diseases. Nutritional and metabolome studies are effective in studying the  
39 effects of specific dietary supplements and will contribute to the development of  
40 functional foods.

## 42 Introduction

43 Preventive and alternative medicines have shown to improve the quality of life,  
44 especially in the elderly population. Good health conditions may be attained by life  
45 habits, such as regular exercise, good sleep, and a proper diet. The effects of food on  
46 the quality of life have been extensively studied, and various functional foods and  
47 supplements are recommended to preserve or improve health. Fruits contain potent  
48 ingredients that affect our health. Citrus fruits are popular in several countries and  
49 have various health benefits [1]. The dried peels of *Citrus unshiu* and *C. reticulata*,  
50 which are used as natural medicines in Japan and China, show beneficial effects,  
51 including improved brain function [2]. The peel extract of *C. depressa* helps prevent  
52 obesity in mice fed with a high-fat diet [3]. Moreover, supplements of *C. unshiu* peel  
53 extract have been found to restore adenocarcinoma-induced weight loss in mice [4].  
54 Citrus peels contain high amounts of flavonoids, which contribute to the  
55 health-beneficial effects [2]. Hesperidin and nobiletin flavonoids found in several citrus  
56 fruits show beneficial effects against some features of metabolic syndrome [1].  
57 Interestingly, nobiletin shows a protective effect against metabolic syndrome by  
58 enhancing circadian rhythms [5], and oral administration of hesperidin reduces the  
59 levels of inflammatory markers in patients with metabolic syndrome [6]. In addition,

60 the peel of immature citrus fruits contains relatively high levels of flavonoids and  
61 antioxidants than those in mature fruit peels [7,8].

62 *C. tumida* hort. ex Tanaka is a native citrus found around Mt. Tsukuba in Ibaraki  
63 prefecture, Japan [9]. *C. tumida* contains high levels of hesperidin and nobiletin than  
64 those in other species of citrus fruits [10]. However, the potential health benefits of *C.*  
65 *tumida* have not been investigated. Therefore, we aimed to elucidate the health  
66 benefits of *C. tumida*, especially for preventing obesity and depression, which are  
67 linked to inflammation. We first carried out a comprehensive metabolite analysis of *C.*  
68 *tumida*. Omics approaches are considered valuable tools to study the effects of food  
69 and farm products on health [11]. Metabolomics is frequently employed to elucidate  
70 food-induced alterations in global metabolism in humans and other animals. In this  
71 study, we investigated the health benefits of the peel of immature *C. tumida* (PIC) by  
72 evaluating the effects of diets supplemented with PIC on food intake (FI), body weight  
73 gain (BWG), and the metabolome in plasma and liver of mice.

74

## 75 **Materials and Methods**

### 76 **Animals and plant materials**

77 This study was approved by the Animal Care and Use Committee of Ibaraki University  
78 and conforms to the guidelines of the Ministry of Education, Culture, Sports, Science,  
79 and Technology (MEXT), Japan (Notification No. 71).

80 Male C57BL/6JmsSlc (B6) mice (7-week-old) obtained from SLC Japan (Shizuoka,  
81 Japan) were housed at the animal facility of the College of Agriculture, Ibaraki  
82 University under a 12-h light-dark cycle (light on at 8:00 am). Prior to the experiments,  
83 the mice were individually housed in cages (143 × 293 × 148 mm, Charles River  
84 Laboratories Japan, Kanagawa, Japan) with wood chips. The mice were fed with a  
85 semi-purified diet (AIN-93G, Oriental Yeast, Tokyo, Japan). Food and water were  
86 available *ad libitum* and were weighed to monitor the daily consumption. Body weight  
87 was also determined daily to calculate BWG.

88 Immature *C. tumida* was harvested at an orchard in the eastern foothill of Mt.  
89 Tsukuba, Ibaraki prefecture, Japan, in early October 2015. Peels containing the outer  
90 orange layer and the inner white layer were manually collected and freeze-dried using  
91 a freeze-dryer (FDU-1110, TOKYO RIKAKIKAI, Tokyo, Japan). Dried peels were  
92 powdered using a centrifugal mill (ZM-1, Retsch technology GmbH, Haan, Germany).

93 Peel powder was stored at room temperature (23–26 °C) until use.

94

## 95 **Detection of flavonoids by high-performance liquid**

### 96 **chromatography**

97 To determine the flavonoid levels in PIC, concentrations of nobiletin, narirutin,

98 geosmin, hesperidin, and tangeretin were simultaneously analyzed by

99 high-performance liquid chromatography (HPLC) (Hitachi Chromaster System, Hitachi,

100 Tokyo, Japan). Flavonoid standards were purchased from Wako Pure Chemical

101 Industries, Ltd (Osaka, Japan). Dried PIC powder (100 mg) was mixed and extracted

102 with 4 mL methanol:dimethyl sulfoxide (1:1) with agitation for 12 h at room

103 temperature using a shaker (NR-10, Taitec, Tokyo, Japan). After the eluted solution

104 was centrifuged at 1000 *g* for 5 min, the supernatant was collected and filtered

105 through a membrane filter (Millex-GS 0.22 µm, Merck Millipore, Darmstadt, Germany).

106 Samples were stored at –80 °C until analysis. A 10-µL sample aliquot was injected into

107 the HPLC apparatus and analyzed with a photodiode array detector. ZORBAX SB-C8

108 (150 × 3.0 mm i.d.) (Agilent Technologies, Tokyo, Japan) was used as a separation

109 column, and Agilent Hardware Kit High Press was used as a guard column (Agilent

110 Technologies). The temperature of the column oven was set at 40 °C and spectra from

111 200 to 450 nm were obtained. The linear gradient elution program consisted of an  
112 initial 20 min (mobile phase, from 80% and 20% to 0% and 100% of formic acid and  
113 methanol, respectively) followed by 5 min of 100% methanol at a flow rate of 1.0  
114 mL/min. Concentrations of the compounds were calculated from integrated peak areas  
115 of the sample and the corresponding authentic standards.

116

## 117 **Experimental design**

118 After acclimatization to the environment of the animal facility in Ibaraki University for  
119 one week, the B6 mice were divided into two groups: control ( $n = 6$ ) and PIC-fed ( $n =$   
120 7). The PIC-fed group was fed 5% (w/w) PIC powder in the AIN93G powder diet,  
121 whereas the control group was fed only AIN93G powder for four weeks.

122

## 123 **Tissue sampling**

124 After fasting from 9:00 am to 12:00 am, the mice were sacrificed by decapitation and  
125 trunk blood was collected in a tube on ice. Final concentration was set at 0.13%  
126 EDTA-2K. The sample was centrifuged at 1,200  $g$  at 23 °C for 10 min. The supernatant  
127 blood plasma was collected and stored at -80 °C until use. Approximately 50 mg from  
128 the left lobe of the liver was removed and immediately frozen in liquid nitrogen and



129 stored at  $-80^{\circ}\text{C}$  until use. Epididymal, perirenal, and subcutaneous fats were collected  
130 and weighed. Tissue weight was normalized to body weight (BW) on the day of  
131 sampling.

132

### 133 **Metabolomic analysis of plasma and liver**

134 Nine representative mice were selected for the metabolome analysis. The plasma and  
135 liver samples ( $n = 5$  in the control group,  $n = 4$  in PIC-fed group) were subjected to  
136 metabolomic analysis as previously reported [12]. Sample preparation and  
137 metabolome analysis were carried out by HMT (Human Metabolome Technology Inc.  
138 Tsuruoka, Japan). Capillary electrophoresis time-of-flight mass spectrometry  
139 (CE-TOFMS) analysis of the metabolome was performed using an Agilent CE Capillary  
140 Electrophoresis System equipped with an Agilent 6210 Time of Flight mass  
141 spectrometer (Agilent Technologies, Waldbronn, Germany) at HMT following  
142 previously described protocols [12–15]. Briefly, approximately 50 mg frozen liver  
143 sample was immersed in 1800  $\mu\text{L}$  50% acetonitrile in Milli-Q water (Millipore-Japan,  
144 Tokyo, Japan) containing internal standards (H3304-1002, HMT). The tissue was  
145 homogenized using the BMS-M10N21 homogenizer (BMS, Tokyo, Japan) and then  
146 centrifuged at 2300  $g$  for 5 min at  $4^{\circ}\text{C}$ . Next, 800  $\mu\text{L}$  of the upper layer was filtered by

147 centrifugation using an HMT 5-kDa cut-off filter (UFC3LCCNB-HMT, HMT) at 9100 *g* for  
148 120 min at 4 °C. The filtrate was resuspended in 50 µL Milli-Q water for CE-MS analysis.  
149 For plasma, 50 µL sample was added to 450 µL methanol containing internal standards  
150 (H3304-1002, HMT). The solution was mixed with 500 µL chloroform and 200 µL  
151 Milli-Q water and centrifuged at 2300 *g* for 5 min at 4 °C. Next, 400 µL of the upper  
152 layer was filtered through an HMT 5-kDa cut-off filter as described above. The filtrate  
153 was then resuspended in 25 µL Milli-Q water for CE-MS analysis.  
154 The identified metabolites from the metabolome library were assigned to the Kyoto  
155 Encyclopedia of Genes and Genomes (KEGG), facilitating the search for the  
156 corresponding metabolic pathways [16].

157

## 158 **Statistical analysis**

159 BWG, FI, water intake (WI), and tissue weights were analyzed by an unpaired  
160 two-tailed Student's *t*-test. Data were analyzed using Excel (Microsoft, WA) and are  
161 shown as mean ± SEM. For metabolomic analyses, Welch's *t*-tests were used to  
162 compare the “supplementation” factor. To control for *P*-values of multiple  
163 comparisons, the false discovery rate was determined based on previously published  
164 studies [17,18]. The significance threshold was set to  $Q < 0.1$ .

## 166 Results

### 167 Concentrations of major flavonoids in PIC

168 We analyzed the major flavonoids, including nobiletin, narirutin, geosmin, hesperidin,  
169 and tangeretin, in PIC using HPLC (Table 1). Unfortunately, nobiletin and narirutin  
170 could not be separated under the HPLC conditions described above. Previous data  
171 showed that the concentration of nobiletin is approximately 3 times that of narirutin in  
172 *C. tumida* [41]; hence, nobiletin is relatively a major flavonoid in PIC.

173

**Table 1. Flavonoid content in peels of  
immature *Citrus tumida* (100 mg).**

| <b>Flavonoids</b>     | <b>(mg)</b> |   |       |
|-----------------------|-------------|---|-------|
| Nobiletin + Narirutin | 0.674       | ± | 0.015 |
| Geosmin               | 0.078       | ± | 0.003 |
| Hesperidin            | 0.206       | ± | 0.010 |
| Tangeretin            | 0.249       | ± | 0.009 |

174

## 175 **BWG, FI, WI, and feed efficiency**

176 We measured cumulative BWG, FI, and WI to evaluate the effect of PIC  
177 supplementation. Mice from the PIC-fed group showed lower BWG (control:  $4.45 \pm$   
178  $0.47$  g vs. PIC:  $3.20 \pm 0.22$  g,  $P = 0.0267$ , Fig 1A) and a tendency for lower FI (control:  
179  $126.18 \pm 3.69$  g vs. PIC:  $117.76 \pm 1.70$  g,  $P = 0.0517$ , Fig 1B) when compared to control  
180 mice. No significant difference was observed in WI (control:  $121.40 \pm 4.52$  g vs. PIC:  
181  $125.10 \pm 1.90$  g,  $P = 0.4470$ , Fig 1C). Mice from the PIC-fed group also showed a  
182 tendency to have a lower feed efficiency than that in control mice (control:  $0.035 \pm$   
183  $0.0036$  vs. PIC:  $0.027 \pm 0.0020$ ,  $P = 0.0706$ , Fig 1D).

184

185 **Fig 1. Effects of supplementation of the peels of immature *Citrus tumida* (PIC) on (A)**

186 **cumulative body weight gain, (B) food intake, (C) water intake, and (D) feed**

187 **efficiency ( $n = 6-7$  in each group). Control: mice fed with AIN93G diet; PIC: mice fed**

188 **with AIN93G supplemented with 5% PIC (w/w) diet. Data are expressed as mean  $\pm$  SEM.**

189 <sup>†</sup> $P < 0.10$ , \* $P < 0.05$ , \*\* $P < 0.01$  versus control.

190

## 191 **Liver and fat weights**

192 As shown in Fig 2A, liver weight (as % of BW) of PIC-fed mice was higher than that of  
193 control mice (control,  $4.01 \pm 0.13\%$  vs. PIC,  $4.57 \pm 0.057\%$ ,  $P = 0.0015$ ). The weight of  
194 epididymal, perirenal, and subcutaneous fats (as % BW) in PIC-fed mice was  
195 significantly lower than that in control mice (epididymal fats – control:  $1.85 \pm 0.15\%$   
196 vs. PIC:  $1.40 \pm 0.047\%$ ,  $P = 0.0104$ ; perirenal fat – control:  $0.60 \pm 0.067\%$  vs. PIC:  $0.35$   
197  $\pm 0.010\%$ ,  $P = 0.0021$ ; subcutaneous fat – control,  $0.32 \pm 0.026\%$  vs. PIC,  $0.22 \pm 0.029$   
198  $\%$ ,  $P = 0.0404$ ) (Fig 2B, 2C, and 2D).

199

200 **Fig 2. Effects of supplementation of the peels of immature *Citrus tumida* (PIC) on (A)**  
201 **cumulative liver weight, (B) epididymal fat weight, (C) perirenal fat weight, and (D)**  
202 **subcutaneous fat weight ( $n = 6-7$  in each group). Control: mice with fed AIN93G diet;**  
203 **PIC: mice fed with AIN93G containing 5% PIC (w/w) diet. Data are expressed as mean  $\pm$**   
204 **SEM. \* $P < 0.05$ , \*\* $P < 0.01$  versus control.**

205

## 206 **Metabolomics**

207 CE-TOFMS revealed 191 metabolites in the plasma. A single metabolite,  
208 2-hydroxyvaleric acid, showed significantly ( $P < 0.05$  and  $Q < 0.1$ ) lower levels in  
209 PIC-fed mice than in control mice (Table 2).

**Table 2. Metabolites affected by ingestion of peels of immature *Citrus tumida* (Q<0.1).**

| metabolite                             | sample | ratio<br>(supl/cont) | <i>p</i>   | <i>Q</i> |
|----------------------------------------|--------|----------------------|------------|----------|
| 2-Hydroxyvaleric acid                  | plasma | 0.8                  | 6.0326E-05 | 0.01152  |
| Thr-Asp<br>(Ser-Glu)                   | liver  | 2.4                  | 1.1E-04    | 0.02762  |
| Daminozide<br>(Ala-Ala)                | liver  | 1.4                  | 4.5E-04    | 0.05596  |
| Glucuronic acid<br>(Galacturonic acid) | liver  | 1.6                  | 4.6E-04    | 0.03793  |
| Betaine aldehyde                       | liver  | 0.5                  | 8.3E-04    | 0.05161  |
| S-Methylglutathione                    | liver  | 1.6                  | 9.1E-04    | 0.04538  |

210

211 A total of 250 metabolites were detected by CE-TOFMS in the liver. As shown in Table

212 1, 5 metabolites showed significant differences in levels between PIC-fed and control

213 mice ( $P < 0.05$  and  $Q < 0.1$ ). The relative amounts of Thr-Asp (and/or Ser-Glu),

214 daminozide (and/or Ala-Ala), glucuronic acid (and/or galacturonic acid-2), and  
215 S-methylglutathione were significantly higher in PIC-fed mice than in control mice. In  
216 contrast, the relative amount of betaine aldehyde was significantly lower in PIC-fed  
217 mice than in control mice.

## 219 Discussion

220 In this study, we investigated the health benefits of a local citrus fruit, *C. tumida*, and  
221 focused on the dietary effects of PIC, which contains flavonoids, such as nobiletin and  
222 hesperidin. As shown in Table 1, PIC contained high amounts of nobiletin and narirutin  
223 compared to other flavonoids, although the peaks of nobiletin and narirutin could not  
224 be separated under the conditions described in the Methods. Supplementation of PIC  
225 significantly suppressed BWG compared to that observed with the control diet ( $p <$   
226  $0.05$ , Fig 1A); although FI and feed efficiency were reduced slightly, the difference was  
227 not statistically significant ( $p < 0.1$ , Fig 1B and 1D). In addition, PIC intake significantly  
228 decreased the weight of adipose tissues ( $p < 0.05$ , Fig 2B, 2C, and 2D). These effects  
229 may result from the presence of flavonoids in PIC, which can affect lipid metabolism. In  
230 particular, *C. tumida* contains high levels of hesperidin, nobiletin, and tangeretin [10].  
231 Hesperidin has several biological and pharmacological properties, such as  
232 anti-inflammatory, anti-carcinogenic, anti-oxidative, vascular protective, and  
233 lipid-lowering activities [19–21]. Moreover, nobiletin and hesperidin repress the  
234 expression of genes related to lipid synthesis, such as stearoyl-CoA desaturase [22]. In  
235 general, several citrus fruit-flavonoids have anti-inflammatory, insulin-sensitizing, and  
236 lipid-lowering activities [1]. Therefore, the flavonoids in PIC may reduce body fat



237 deposition and suppress BWG in mice.

238 Metabolomics is widely used in food science and nutrition research [23], and the use

239 of CE-TOFMS reveals the global effects of food on metabolism [11]. In this study, the

240 plasma and liver metabolites of PIC-fed and control mice were analyzed and compared

241 comprehensively using CE-TOFMS, and significant differences were detected,

242 suggesting that this approach may provide important metabolic information about the

243 effects of oral PIC supplementation. In humans, the metabolomic analysis of the

244 effects of diets, including citrus fruits, was similarly successful [24].

245 The blood plasma levels of 2-hydroxyvaleric acid (2-hydroxypentanoic acid) decreased

246 in PIC-fed mice ( $p < 0.05$ ,  $Q < 0.1$ , Table 2). 2-Hydroxyvaleric acid is present in human

247 fluids and is related to the pathophysiological metabolites in acidosis [25]. The

248 biological function of 2-hydroxyvaleric acid in animal tissues is unclear. Non-obese

249 diabetic (NOD) mice are widely used in type 1 diabetes studies, and they are divided

250 into progressor and non-progressor groups depending on whether or not the animal

251 shows disease progression [26]. The authors showed that plasma levels of

252 2-hydroxyvaleric acid are lower in non-progressor than in progressor NOD mice, and

253 therefore, 2-hydroxyvaleric acid may be a good predictor of type 1 diabetes. In

254 addition, plasma levels of 2-hydroxyvaleric acid in humans are decreased by

255 simvastatin, a statin that reduces LDL-cholesterol levels and the risk of cardiovascular  
256 disease [27]. It is possible that simvastatin, or a metabolite of the drug, inhibits an  
257 enzyme that produces 2-hydroxyvaleric acid. Although the precise mechanism  
258 underlying these effects is unknown, PIC may modify the fatty acid metabolism and  
259 downregulate the 2-hydroxyvaleric acid synthesis pathway, resulting in lower levels in  
260 the plasma.

261 Thr-Asp and/or Ser-Glu levels increased in the liver of PIC-fed mice compared to those  
262 in the liver of control mice ( $p < 0.05$ ,  $Q < 0.1$ , Table 2). PIC may increase proteolysis in  
263 the liver, leading to increased dipeptide levels. Daminozide and/or Ala-Ala levels also  
264 increased in the liver of PIC-fed mice ( $p < 0.05$ ,  $Q < 0.1$ , Table 2). Daminozide is used as  
265 a pesticide and is unlikely to be normally present in animal tissues. Ala-Ala is a  
266 dipeptide derived from proteolysis, and increased levels may be the result of increased  
267 protein catabolism. D-Ala-D-Ala is an important component of peptidoglycan in the  
268 bacterial cell wall [28,29]. A previous study reported that vancomycin-sensitive  
269 gram-positive gut bacteria may promote hepatocellular carcinoma through the  
270 enterohepatic circulation of gut bacterial metabolites or toxins [30]. D-Ala-D-Ala in the  
271 gut may, therefore, be carried to the liver via the enterohepatic circulation. Dietary  
272 plant fibers, including pectin, a major component in citrus peels, strongly affect the

273 intestinal bacterial ecosystem [31] and thus increase the Ala-Ala levels in the liver of  
274 PIC-fed mice.

275 The levels of glucuronic and UDP-glucuronic acids increased in the liver after PIC  
276 supplementation ( $p < 0.05$ , Table 2, Table S2). Since both of them play a pivotal role in  
277 the elimination of toxic substances [32], increased levels of glucuronic and  
278 UDP-glucuronic acids by PIC may contribute to enhanced detoxification in the liver.

279 PIC also increased the levels of galacturonic acid in the liver ( $p < 0.05$ ,  $Q < 0.1$ , Table 2).  
280 Galacturonic acid is the main component of pectin [33], which is digested by several  
281 fibrolytic enzymes produced by intestinal microorganisms [34]. Pectin is a major  
282 component of citrus peels. Therefore, the digestion of PIC produces galacturonic acid  
283 in the mouse intestine, and this metabolite is possibly transported to and accumulated  
284 in the liver. It has been reported that orally fed pectin and galacturonic acid inhibit  
285 hepatic lipogenesis in rats [35]. Lipid metabolism should be studied in PIC-fed mice to  
286 clarify these and other issues. The functions of other dietary fibers in PIC should also  
287 be investigated.

288 Reduced glutathione (GSH), a major protectant against oxidative stress, is methylated  
289 in the SH group of its cysteine moiety and converted to S-methylglutathione. Levels of  
290 S-methylglutathione increased in PIC-fed mice compared to those in control mice ( $p <$

291 0.05,  $Q < 0.1$ , Table 2). In addition, oxidized glutathione (GSSG) levels in the liver of  
292 PIC-fed mice were slightly higher than those in control mice ( $p < 0.1$ , Table S4). PIC may  
293 thus be able to increase anti-oxidative stress activity via glutathione metabolism in the  
294 liver. In fact, chronic administration of *C. unshiu* extracts reduces oxidative stress in the  
295 liver of diabetic rats by increasing glutathione levels [36]. The function of  
296 S-methylglutathione in the liver is unclear. However, in the central nervous system,  
297 S-methylglutathione is released upon hypoxia and depolarization [37] and central  
298 administration of S-methylglutathione mitigates acute stress in neonatal chicks [38].  
299 Therefore, S-methylglutathione may play an important role in the central nervous  
300 system. Future studies are necessary to assess the function of S-methylglutathione in  
301 the liver and the effects of increased S-methylglutathione levels induced by PIC on the  
302 liver function.

303 Supplementation of PIC downregulated choline metabolism in the liver (Table 2, Table  
304 S2, Fig 3). GPCho is a product of the breakdown of phosphatidylcholine and is  
305 converted to choline by GPCho phosphodiesterase. Choline dehydrogenase produces  
306 betaine aldehyde from choline [39], and glycine betaine is converted from betaine  
307 aldehyde by aldehyde dehydrogenase [40]. The mechanism underlying the  
308 downregulation of choline metabolism in the liver by PIC supplementation remains

309 unclear. Future studies will focus on evaluating the expression of genes related to  
310 choline metabolism in the liver of PIC-fed mice, and critical ingredients in PIC  
311 downregulating choline metabolism should be discovered.

312

313 **Fig 3. Choline-related metabolites in the liver.** The pathway of choline-related  
314 metabolites in the liver is shown. Welch's *t*-tests were used to compare “supplement,”  
315 using both peels of immature *Citrus tumida* (PIC)-fed mice ( $n = 4$ ) and control mice ( $n =$   
316 5). Control: mice fed with AIN93G diet; PIC: mice fed with AIN93G containing 5% PIC  
317 (w/w) diet. Data are expressed as mean  $\pm$  SEM.

318

319 In summary, we evaluated the effects of PIC supplementation on BWG, FI, WI, adipose  
320 tissue weight, and metabolomics of blood plasma and liver in mice and concluded that  
321 PIC influences body and adipose tissue weights and promotes metabolic alterations.  
322 Especially, plasma 2-hydroxyvaleric acid and liver choline metabolism including betaine  
323 aldehyde were significantly decreased by dietary PIC. In the future, we will focus on  
324 elucidating the mechanisms by which PIC supplementation reduces body fat and  
325 changes the levels of some metabolites in mice. This study used a small cohort and  
326 might have missed some critical metabolites that are significantly altered by dietary

327 PIC. Therefore, in future studies we will try to carry out metabolomic analyses using  
328 larger cohorts of mice and humans to elucidate PIC functions, especially in fat  
329 metabolism. These studies will contribute to establish the effects of PIC on human and  
330 animal health and provide a better understanding of the health benefits of citrus fruits.

## 331 **Acknowledgments**

332 We thank H. Shimonishi and T. Fujii (Ibaraki University) for valuable technical  
333 assistance.

334

335

## 336 **Authors' contribution**

337 A. Toyoda, M. Sato, and T. Goto designed the studies. A. Toyoda, M. Sato, M. Muto, Y.  
338 Miyaguchi, and E. Inoue performed the experiments. A. Toyoda and T. Goto analyzed  
339 the data. A. Toyoda wrote the manuscript.

340

## 341 **References**

- 342 1. Mulvihill EE, Burke AC, Huff MW. Citrus Flavonoids as Regulators of Lipoprotein  
343 Metabolism and Atherosclerosis. *Annu Rev Nutr.* 2016;36: 275–299.  
344 doi:10.1146/annurev-nutr-071715-050718
- 345 2. Ito A, Shin N, Tsuchida T, Okubo T, Norimoto H. Antianxiety-Like Effects of  
346 Chimpi (Dried Citrus Peels) in the Elevated Open-Platform Test. *Molecules.*  
347 2013;18: 10014–10023. doi:10.3390/molecules180810014
- 348 3. Lee Y-S, Cha B-Y, Saito K, Choi S-S, Wang XX, Choi B-K, et al. Effects of a Citrus  
349 depressa Hayata (shiikuwasa) extract on obesity in high-fat diet-induced obese  
350 mice. *Phytomedicine.* 2011;18: 648–54. doi:10.1016/j.phymed.2010.11.005
- 351 4. Kim A, Im M, Gu MJ, Ma JY. Citrus unshiu peel extract alleviates cancer-induced  
352 weight loss in mice bearing CT-26 adenocarcinoma. *Sci Rep.* 2016;6: 24214.  
353 doi:10.1038/srep24214
- 354 5. He B, Nohara K, Park N, Park Y-S, Guillory B, Zhao Z, et al. The Small Molecule  
355 Nobiletin Targets the Molecular Oscillator to Enhance Circadian Rhythms and  
356 Protect against Metabolic Syndrome. *Cell Metab.* 2016;23: 610–21.  
357 doi:10.1016/j.cmet.2016.03.007
- 358 6. Rizza S, Muniyappa R, Iantorno M, Kim J, Chen H, Pullikotil P, et al. Citrus



- 359 polyphenol hesperidin stimulates production of nitric oxide in endothelial cells  
360 while improving endothelial function and reducing inflammatory markers in  
361 patients with metabolic syndrome. *J Clin Endocrinol Metab.* 2011;96: E782-92.  
362 doi:10.1210/jc.2010-2879
- 363 7. Choi S-Y, Ko H-C, Ko S-Y, Hwang J-H, Park J-G, Kang S-H, et al. Correlation  
364 between flavonoid content and the NO production inhibitory activity of peel  
365 extracts from various citrus fruits. *Biol Pharm Bull.* 2007;30: 772–8.
- 366 8. Barreca D, Bellocco E, Caristi C, Leuzzi U, Gattuso G. Flavonoid composition and  
367 antioxidant activity of juices from Chinotto (*Citrus x myrtifolia* Raf.) fruits at  
368 different ripening stages. *J Agric Food Chem.* 2010;58: 3031–6.  
369 doi:10.1021/jf9044809
- 370 9. Tanaka C. Species problem in citrus a critical study of wild and cultivated units of  
371 citrus, based upon field studies in their native homes. Japanese Society for the  
372 Promotion of Science, 9, 139. Tokyo: Japanese Society for the Promotion of  
373 Science; 1954.
- 374 10. Kawaii S, Tomono Y, Katase E, Ogawa K, Yano M. Quantitation of flavonoid  
375 constituents in citrus fruits. *J Agric Food Chem.* 1999;47: 3565–71.
- 376 11. Takahashi S, Saito K, Jia H, Kato H. An Integrated Multi-Omics Study Revealed

- 377 Metabolic Alterations Underlying the Effects of Coffee Consumption. Chowen JA,  
378 editor. PLoS One. 2014;9: e91134. doi:10.1371/journal.pone.0091134
- 379 12. Goto T, Kubota Y, Toyoda A. Plasma and liver metabolic profiles in mice  
380 subjected to subchronic and mild social defeat stress. J Proteome Res. 2015;14:  
381 1025–32. doi:10.1021/pr501044k
- 382 13. Soga T, Heiger DN. Amino acid analysis by capillary electrophoresis electrospray  
383 ionization mass spectrometry. Anal Chem. 2000;72: 1236–41.
- 384 14. Soga T, Ohashi Y, Ueno Y, Naraoka H, Tomita M, Nishioka T. Quantitative  
385 metabolome analysis using capillary electrophoresis mass spectrometry. J  
386 Proteome Res. 2003;2: 488–94.
- 387 15. Soga T, Ueno Y, Naraoka H, Ohashi Y, Tomita M, Nishioka T. Simultaneous  
388 determination of anionic intermediates for *Bacillus subtilis* metabolic pathways  
389 by capillary electrophoresis electrospray ionization mass spectrometry. Anal  
390 Chem. 2002;74: 2233–9.
- 391 16. Kanehisa M, Goto S, Sato Y, Kawashima M, Furumichi M, Tanabe M. Data,  
392 information, knowledge and principle: back to metabolism in KEGG. Nucleic  
393 Acids Res. 2014;42: D199–D205. doi:10.1093/nar/gkt1076
- 394 17. Benjamini Y, Hochberg Y. Controlling the False Discovery Rate: A Practical and

- 395 Powerful Approach to Multiple Testing. *Journal of the Royal Statistical Society.*  
396 *Series B (Methodological)*. WileyRoyal Statistical Society; 1995. pp. 289–300.  
397 doi:10.2307/2346101
- 398 18. Storey JD, Tibshirani R. Statistical significance for genomewide studies. *Proc Natl*  
399 *Acad Sci U S A*. 2003;100: 9440–5. doi:10.1073/pnas.1530509100
- 400 19. Miyake Y, Yamamoto K, Tsujihara N, Osawa T. Protective effects of lemon  
401 flavonoids on oxidative stress in diabetic rats. *Lipids*. 1998;33: 689–95.
- 402 20. Chiba H, Uehara M, Wu J, Wang X, Masuyama R, Suzuki K, et al. Hesperidin, a  
403 citrus flavonoid, inhibits bone loss and decreases serum and hepatic lipids in  
404 ovariectomized mice. *J Nutr*. 2003;133: 1892–7. doi:10.1093/jn/133.6.1892
- 405 21. Morand C, Dubray C, Milenkovic D, Lioger D, Martin JF, Scalbert A, et al.  
406 Hesperidin contributes to the vascular protective effects of orange juice: a  
407 randomized crossover study in healthy volunteers. *Am J Clin Nutr*. 2011;93:  
408 73–80. doi:10.3945/ajcn.110.004945
- 409 22. Nichols LA, Jackson DE, Manthey JA, Shukla SD, Holland LJ. Citrus flavonoids  
410 repress the mRNA for stearyl-CoA desaturase, a key enzyme in lipid synthesis  
411 and obesity control, in rat primary hepatocytes. *Lipids Health Dis*. 2011;10: 36.  
412 doi:10.1186/1476-511X-10-36

- 413 23. Wishart DS. Metabolomics: applications to food science and nutrition research.  
414 Trends Food Sci Technol. Elsevier; 2008;19: 482–493.  
415 doi:10.1016/J.TIFS.2008.03.003
- 416 24. May DH, Navarro SL, Ruczinski I, Hogan J, Ogata Y, Schwarz Y, et al. Metabolomic  
417 profiling of urine: response to a randomised, controlled feeding study of select  
418 fruits and vegetables, and application to an observational study. Br J Nutr.  
419 2013;110: 1760–70. doi:10.1017/S000711451300127X
- 420 25. Asano K, Miyamoto I, Matsushita T, Murakami Y, Minoura S, Wagatsuma T, et al.  
421 Succinic acidemia: a new syndrome of organic acidemia associated with  
422 congenital lactic acidosis and decreased NADH-cytochrome c reductase activity.  
423 Clin Chim Acta. 1988;173: 305–12.
- 424 26. Grapov D, Fahrmann J, Hwang J, Poudel A, Jo J, Periwal V, et al. Diabetes  
425 Associated Metabolomic Perturbations in NOD Mice. Metabolomics. 2015;11:  
426 425–437. doi:10.1007/s11306-014-0706-2
- 427 27. Trupp M, Zhu H, Wikoff WR, Baillie RA, Zeng Z-B, Karp PD, et al. Metabolomics  
428 reveals amino acids contribute to variation in response to simvastatin treatment.  
429 Oresic M, editor. PLoS One. 2012;7: e38386. doi:10.1371/journal.pone.0038386
- 430 28. Wright GD, Walsh CT. D-Alanyl-D-alanine ligases and the molecular mechanism

- 431 of vancomycin resistance. *Acc Chem Res. American Chemical Society*; 1992;25:  
432 468–473. doi:10.1021/ar00022a006
- 433 29. Kumar I, Josephine HR, Pratt RF. Reactions of peptidoglycan-mimetic  
434 beta-lactams with penicillin-binding proteins in vivo and in membranes. *ACS*  
435 *Chem Biol*. 2007;2: 620–4. doi:10.1021/cb7001347
- 436 30. Yoshimoto S, Loo TM, Atarashi K, Kanda H, Sato S, Oyadomari S, et al.  
437 Obesity-induced gut microbial metabolite promotes liver cancer through  
438 senescence secretome. *Nature*. 2013;499: 97–101. doi:10.1038/nature12347
- 439 31. Koropatkin NM, Cameron EA, Martens EC. How glycan metabolism shapes the  
440 human gut microbiota. *Nat Rev Microbiol*. 2012;10: 323–35.  
441 doi:10.1038/nrmicro2746
- 442 32. Rowland A, Miners JO, Mackenzie PI. The UDP-glucuronosyltransferases: their  
443 role in drug metabolism and detoxification. *Int J Biochem Cell Biol*. 2013;45:  
444 1121–32. doi:10.1016/j.biocel.2013.02.019
- 445 33. Mohnen D. Pectin structure and biosynthesis. *Curr Opin Plant Biol*. 2008;11:  
446 266–77. doi:10.1016/j.pbi.2008.03.006
- 447 34. Matsuura Y. Pectic acid degrading enzymes from human feces. *Agric Biol Chem*.  
448 Japan Society for Bioscience, Biotechnology, and Agrochemistry; 1991;55:

- 449 885–886. doi:10.1271/bbb1961.55.885
- 450 35. Suzuki M, Kajuu T. Suppression of hepatic lipogenesis by pectin and galacturonic  
451 acid orally-fed at the separate timing from digestion-absorption of nutrients in  
452 rat. *J Nutr Sci Vitaminol (Tokyo)*. 1983;29: 553–62.
- 453 36. Sugiura M, Ohshima M, Ogawa K, Yano M. Chronic administration of Satsuma  
454 mandarin fruit (*Citrus unshiu* Marc.) improves oxidative stress in  
455 streptozotocin-induced diabetic rat liver. *Biol Pharm Bull*. 2006;29: 588–91.
- 456 37. Kanazawa A, Kakimoto Y, Nakajima T, Sano I. Identification of  
457 gamma-glutamylserine, gamma-glutamylalanine, gamma-glutamylvaline and  
458 S-methylglutathione of bovine brain. *Biochim Biophys Acta*. 1965;111: 90–5.
- 459 38. Yamane H, Tomonaga S, Suenaga R, Denbow DM, Furuse M.  
460 Intracerebroventricular injection of glutathione and its derivative induces  
461 sedative and hypnotic effects under an acute stress in neonatal chicks. *Neurosci*  
462 *Lett*. 2007;418: 87–91. doi:10.1016/j.neulet.2007.03.003
- 463 39. Yilmaz JL, Bülow L. Enhanced stress tolerance in *Escherichia coli* and *Nicotiana*  
464 *tabacum* expressing a betaine aldehyde dehydrogenase/choline dehydrogenase  
465 fusion protein. *Biotechnol Prog*. 2002;18: 1176–82. doi:10.1021/bp020057k
- 466 40. Chern MK, Pietruszko R. Human aldehyde dehydrogenase E3 isozyme is a

467            betaine aldehyde dehydrogenase. *Biochem Biophys Res Commun.* 1995;213:  
468            561–8. doi:10.1006/bbrc.1995.2168

469    41.    Sakai S, Nakagawa R. Studies on the functional ingredients in the farm products  
470            in Ibaraki prefecture. *Bulletins of industrial technology innovation center of*  
471            Ibaraki prefecture. 2011;40. Available from:  
472            <http://www.kougise.pref.ibaraki.jp/periodical/reseach/40/vol40-04.pdf> (in  
473            Japanese)

474

475

A

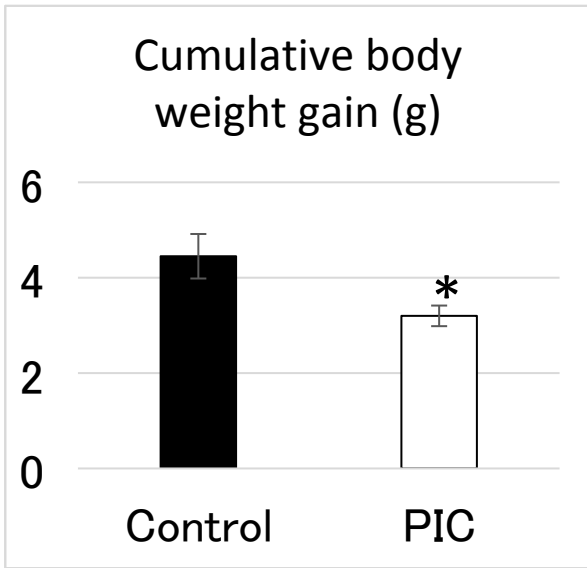

C

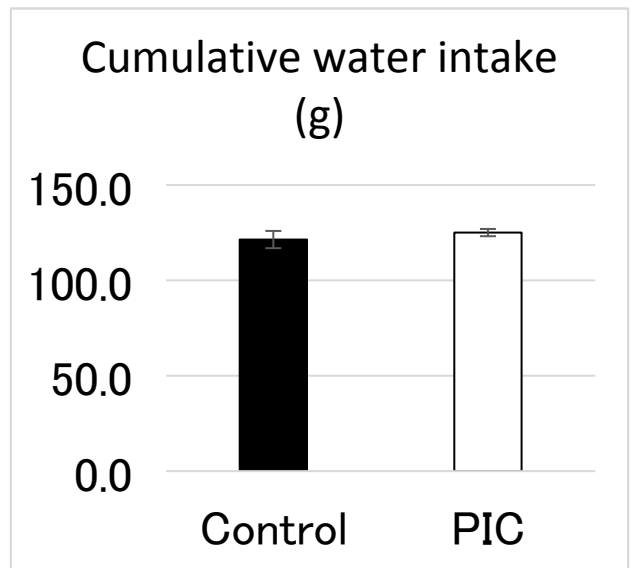

B

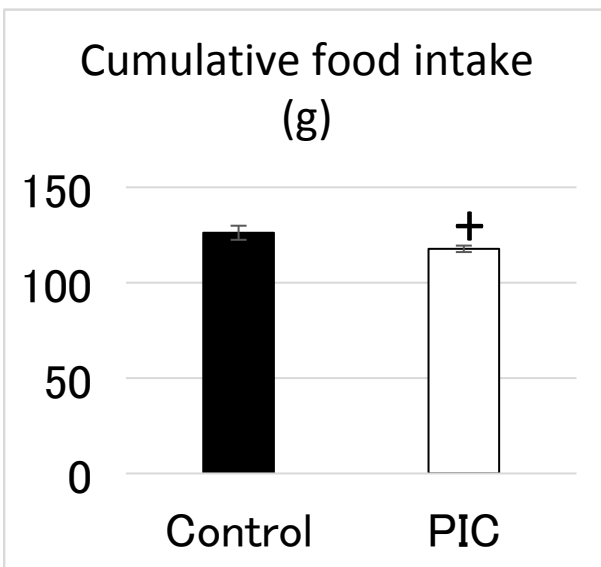

D

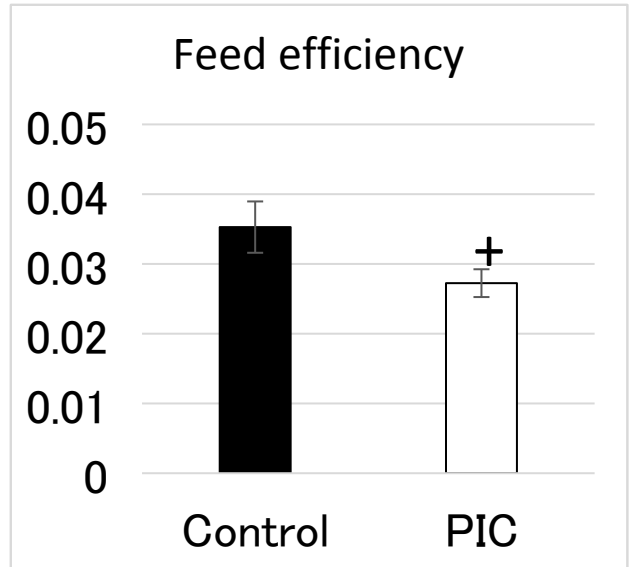



A

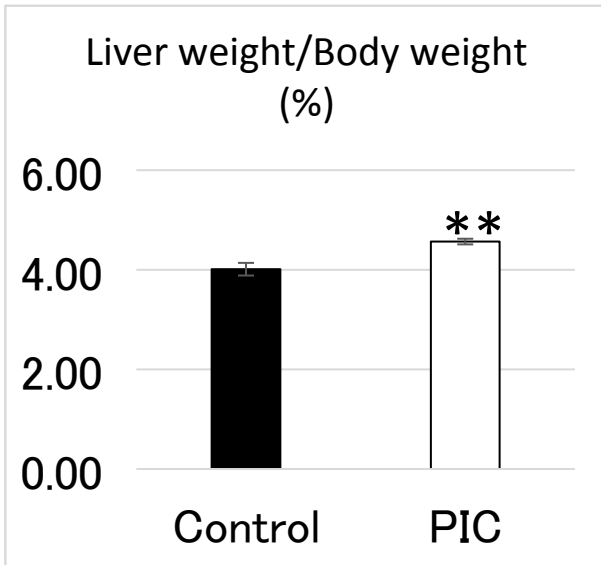

C

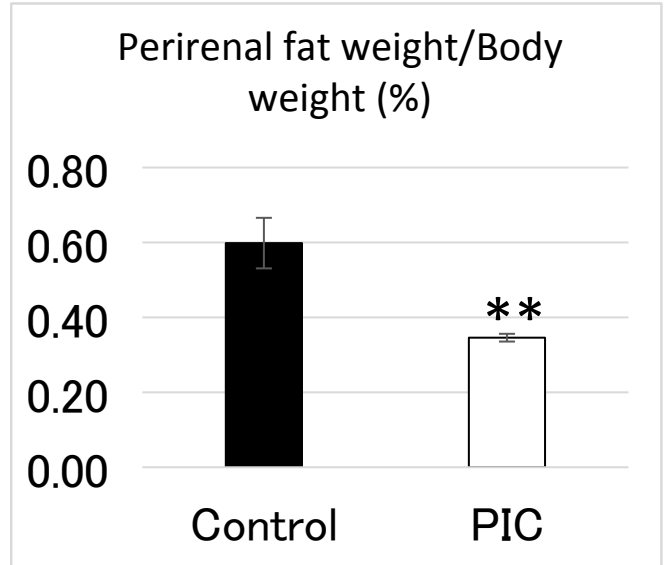

B

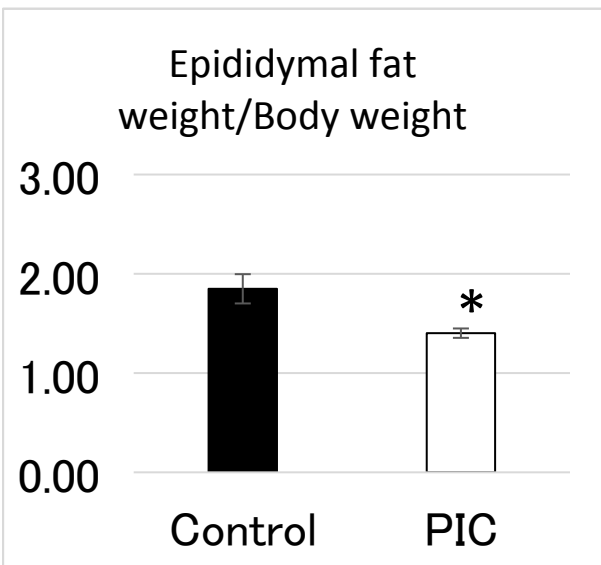

D

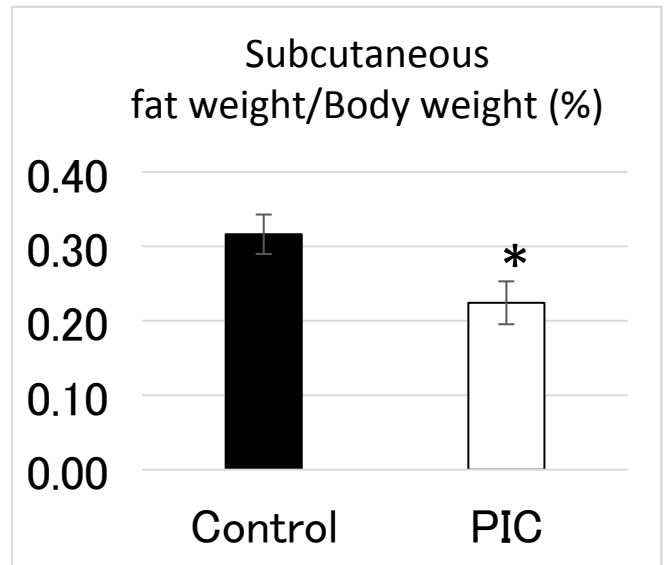

# Lecithin

$p = 0.957$

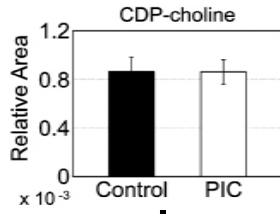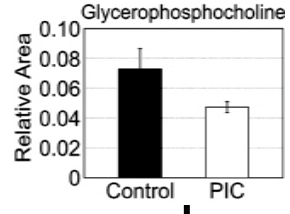

$p = 0.011$

$p = 0.204$

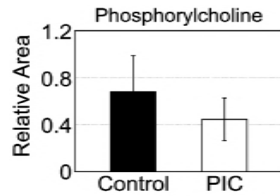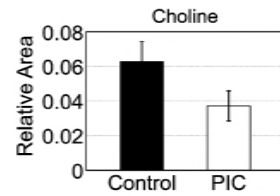

$p = 0.007$

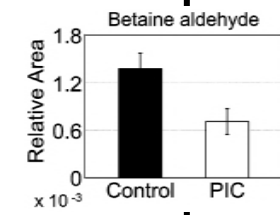

$p = 8.3E-04$

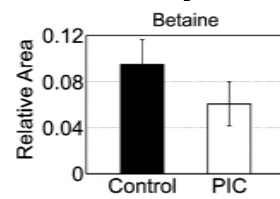

$p = 0.041$

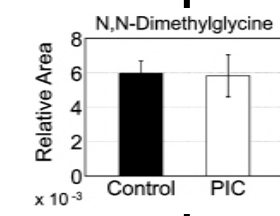

$p = 0.847$

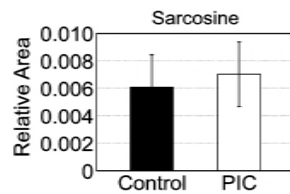

$p = 0.564$
